# Supplementary material for: Selective sensing of heavy metal ions using carbon dots synthesized from Azadirachta indica seeds
Source: Royal Society of Chemistry journal article supplement (doi:10.1039/d4sd00350k), 2025-01-01
Supplement: d4sd00350k1.pdf [file d4sd00350k1.pdf]

## Supporting Information

### **Selective sensing of heavy metal ions using carbon dots synthesized from *Azadirachta indica* seeds**

Somedutta Maity<sup>b</sup>, Sathosh Kumar<sup>b</sup>, Gurmeet Singh<sup>a</sup>, Pradip Paik<sup>\*a</sup>

<sup>a</sup>School of Biomedical Engineering, Indian Institute of Technology (BHU), Varanasi 221 005, UP, India. E-mail: paik.bme@iitbhu.ac.in, pradip.paik@gmail.com

<sup>b</sup>School of Engineering Sciences and Technology, University of Hyderabad, Hyderabad 500 046, Telangana, India.

\*Corresponding author

Supplementary Information available: [details of any supplementary information available should be included here]. See DOI: 10.1039/x0xx00000x

#### Figures:

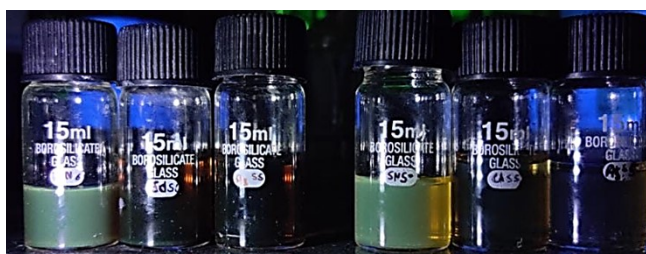

Figure S1. Represents the camera image acquired AI-CDs-1 treated with: a1) only CDs (untreated), b1) with  $\text{Cd}^{2+}$  and c1) with  $\text{As}^{3+}$  and AI-CDs-2 treated with a2) only CDs, b2) with  $\text{Cd}^{2+}$  and c2)  $\text{As}^{3+}$ .

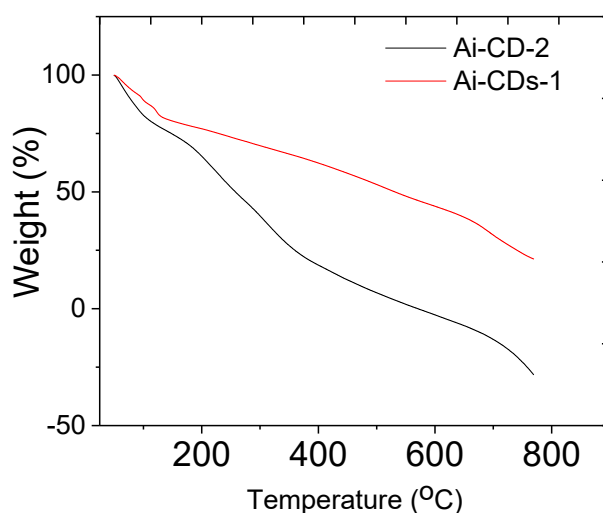

**Fig. S2** TGA results of Ai-CDs-1 and Ai-CDs-2 at a heating rate of  $10\text{ }^{\circ}\text{C min}^{-1}$  under  $\text{N}_2$ -gas atmosphere.

## Supporting Information

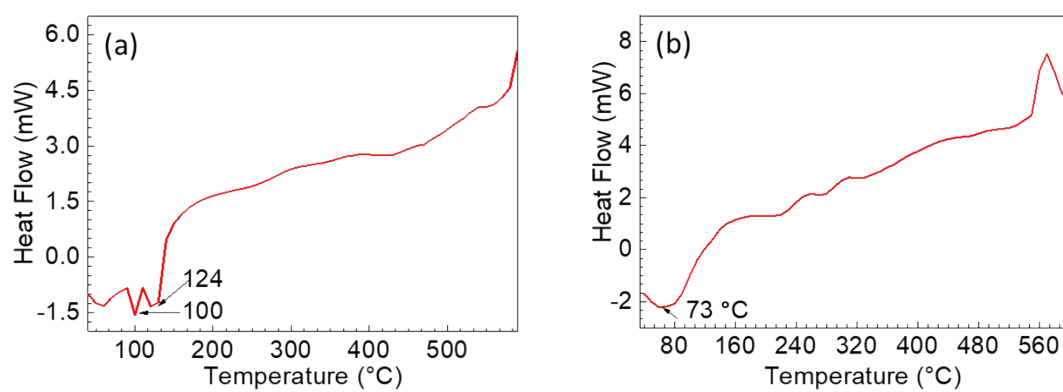

**Figure S3** DSC graph for the samples: (a) Ai-CDs-1 and (b) Ai-CDs-2.
